# Supplementary material
Source: PubMed Central journal article supplement (PMC1326244)

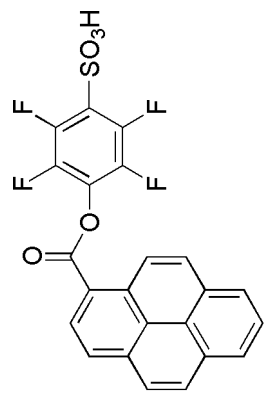

pyr0-STP

$^1\text{H}$  NMR (500 MHz,  $\text{DMSO-}d_6$ )

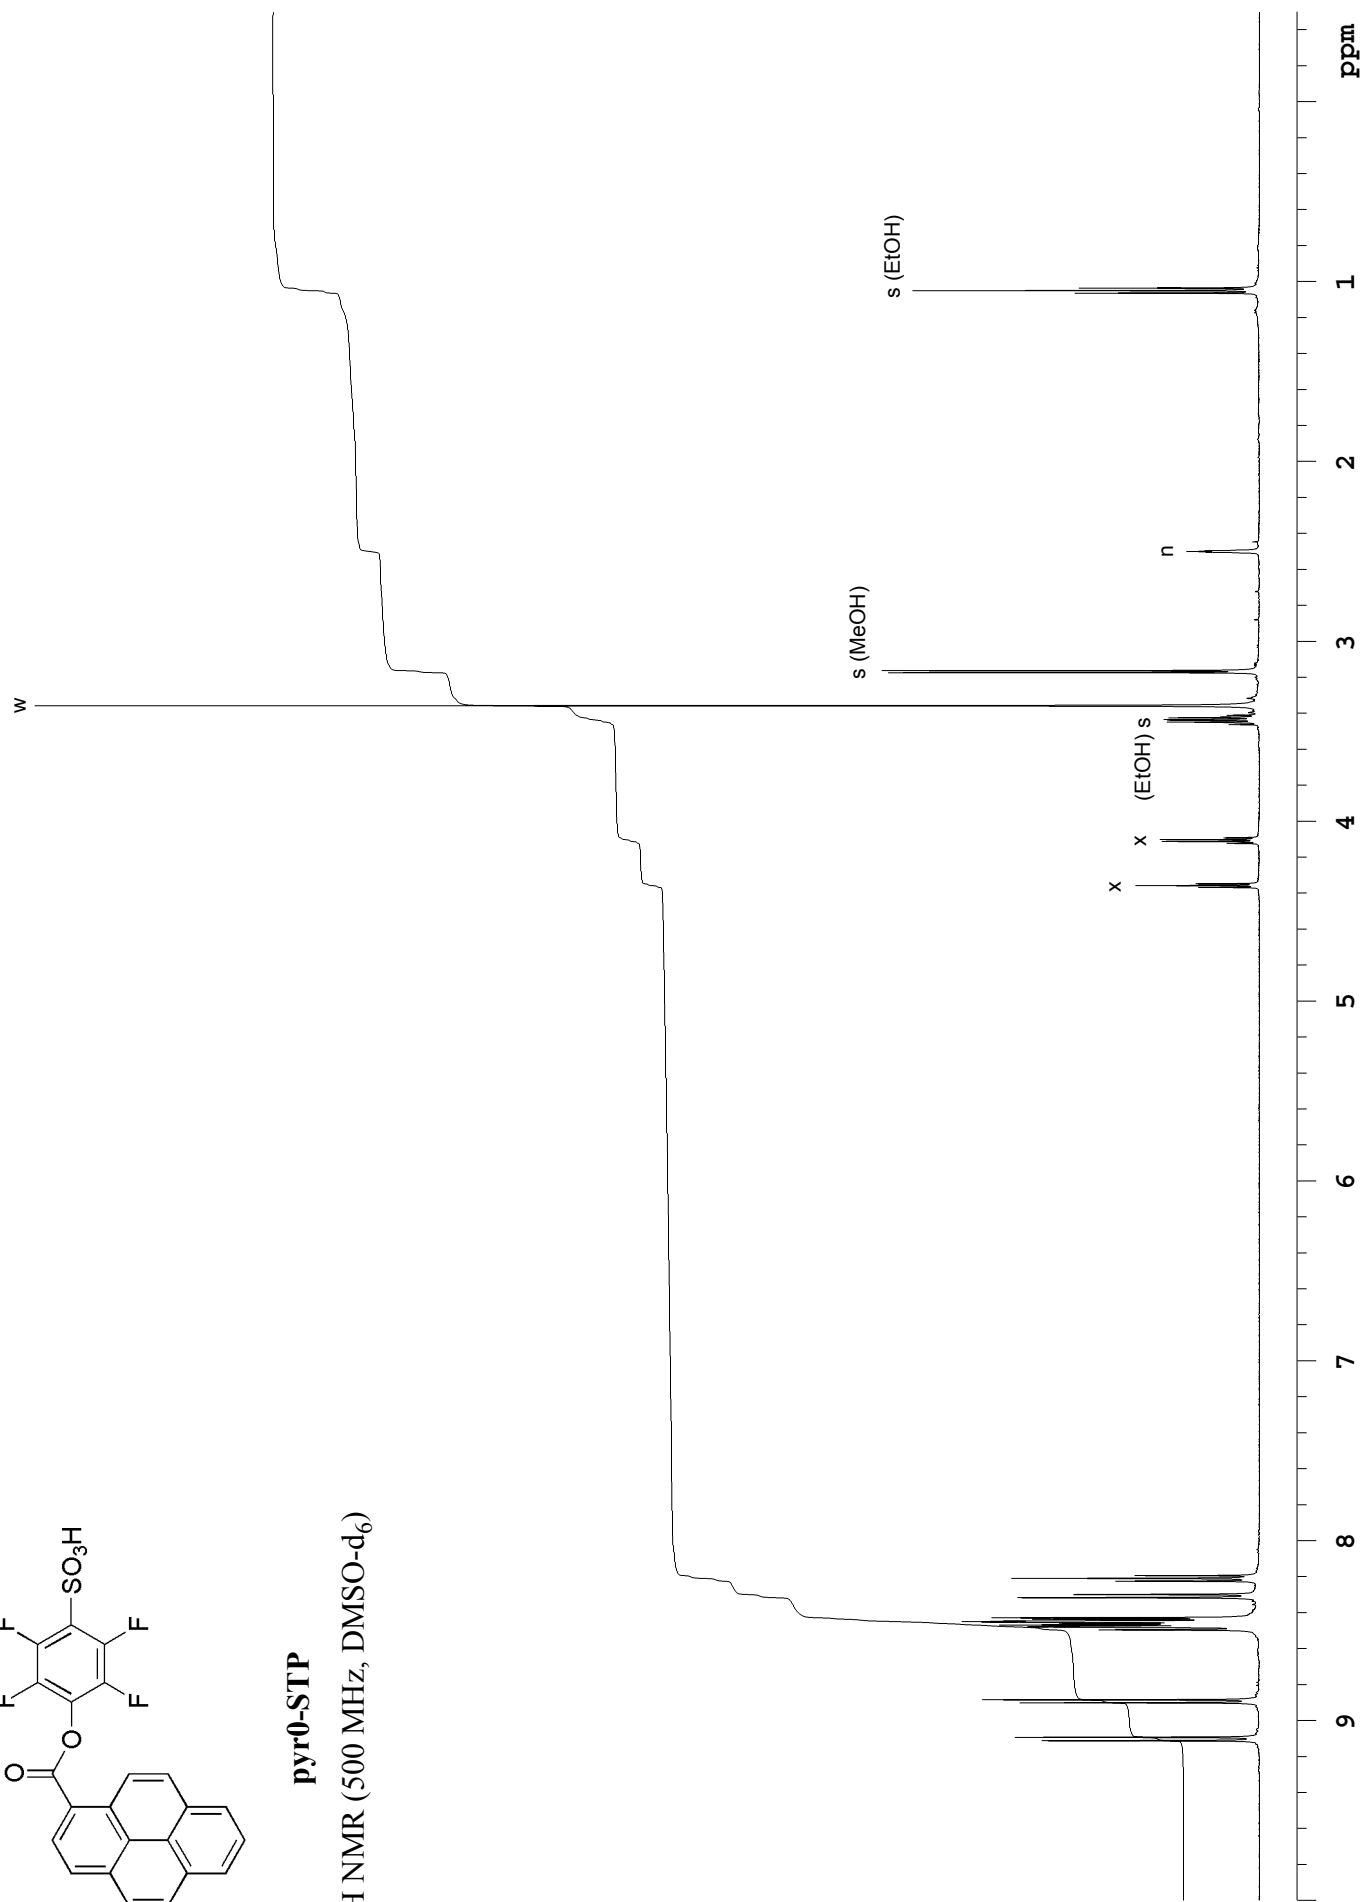

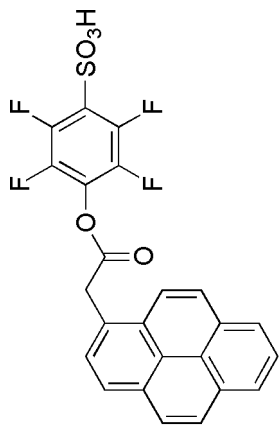

**pyr1-STP**

<sup>1</sup>H NMR (500 MHz, DMSO-d<sub>6</sub>)

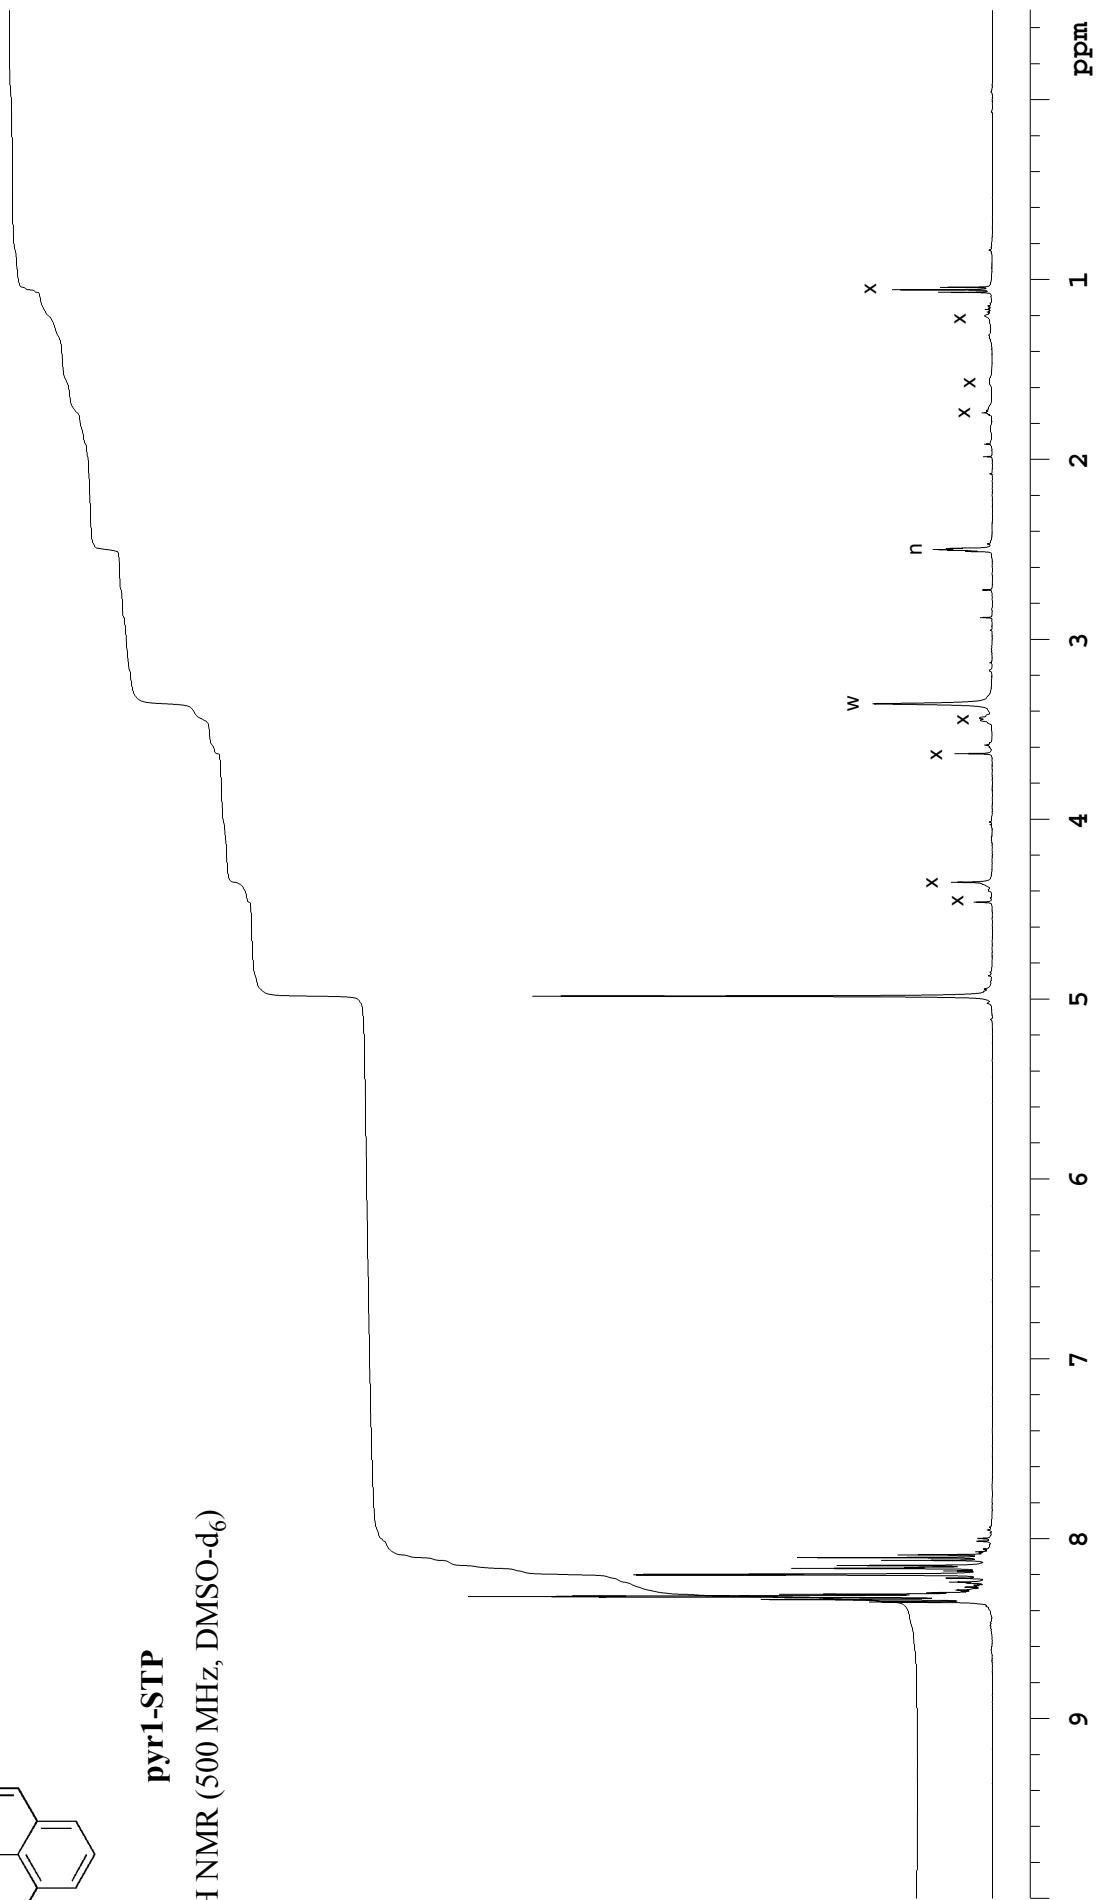

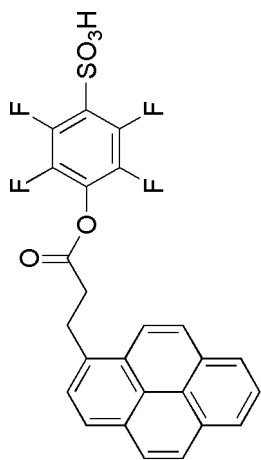

**pyr2-STP**

<sup>1</sup>H NMR (500 MHz, DMSO-d<sub>6</sub>)

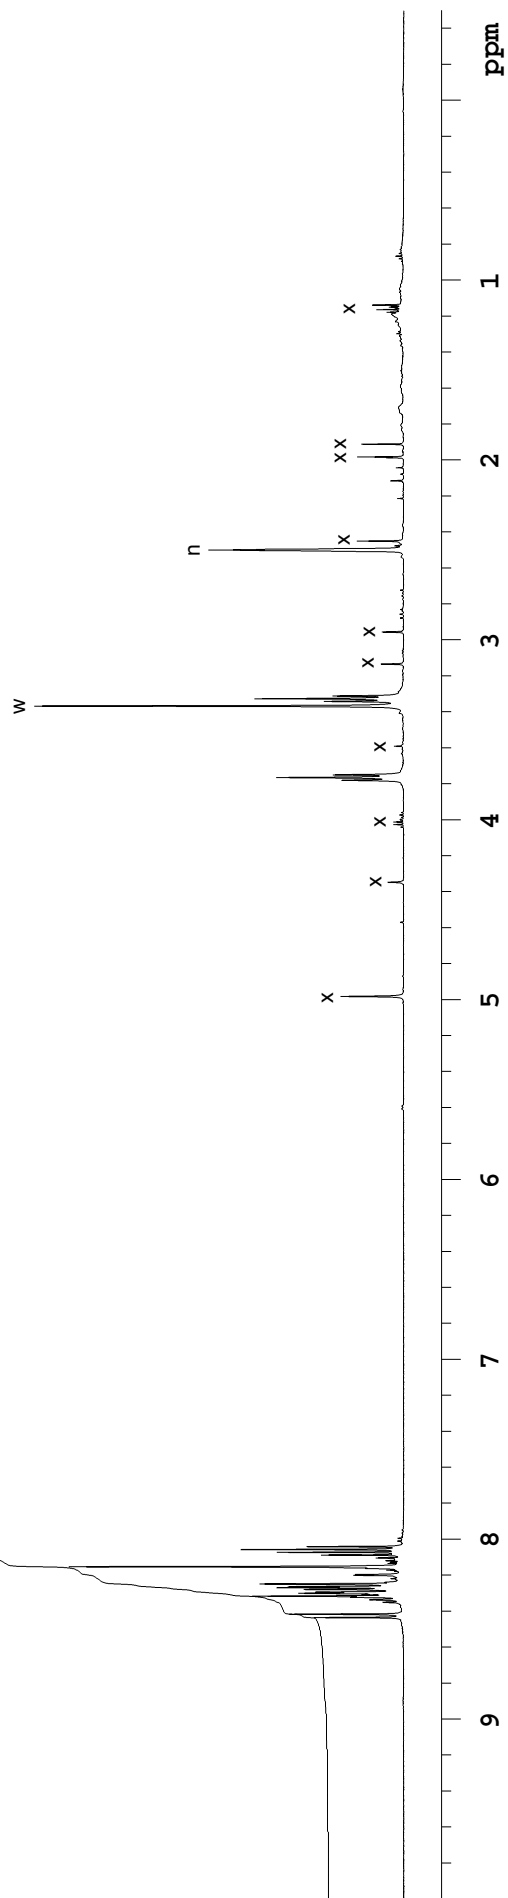

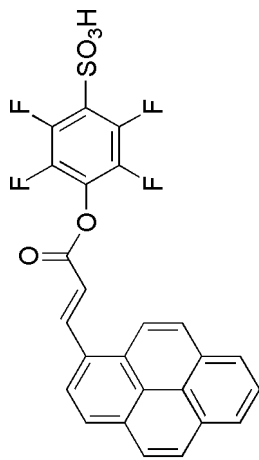

**pyr2U-STP**

<sup>1</sup>H NMR (500 MHz, DMSO-d<sub>6</sub>)

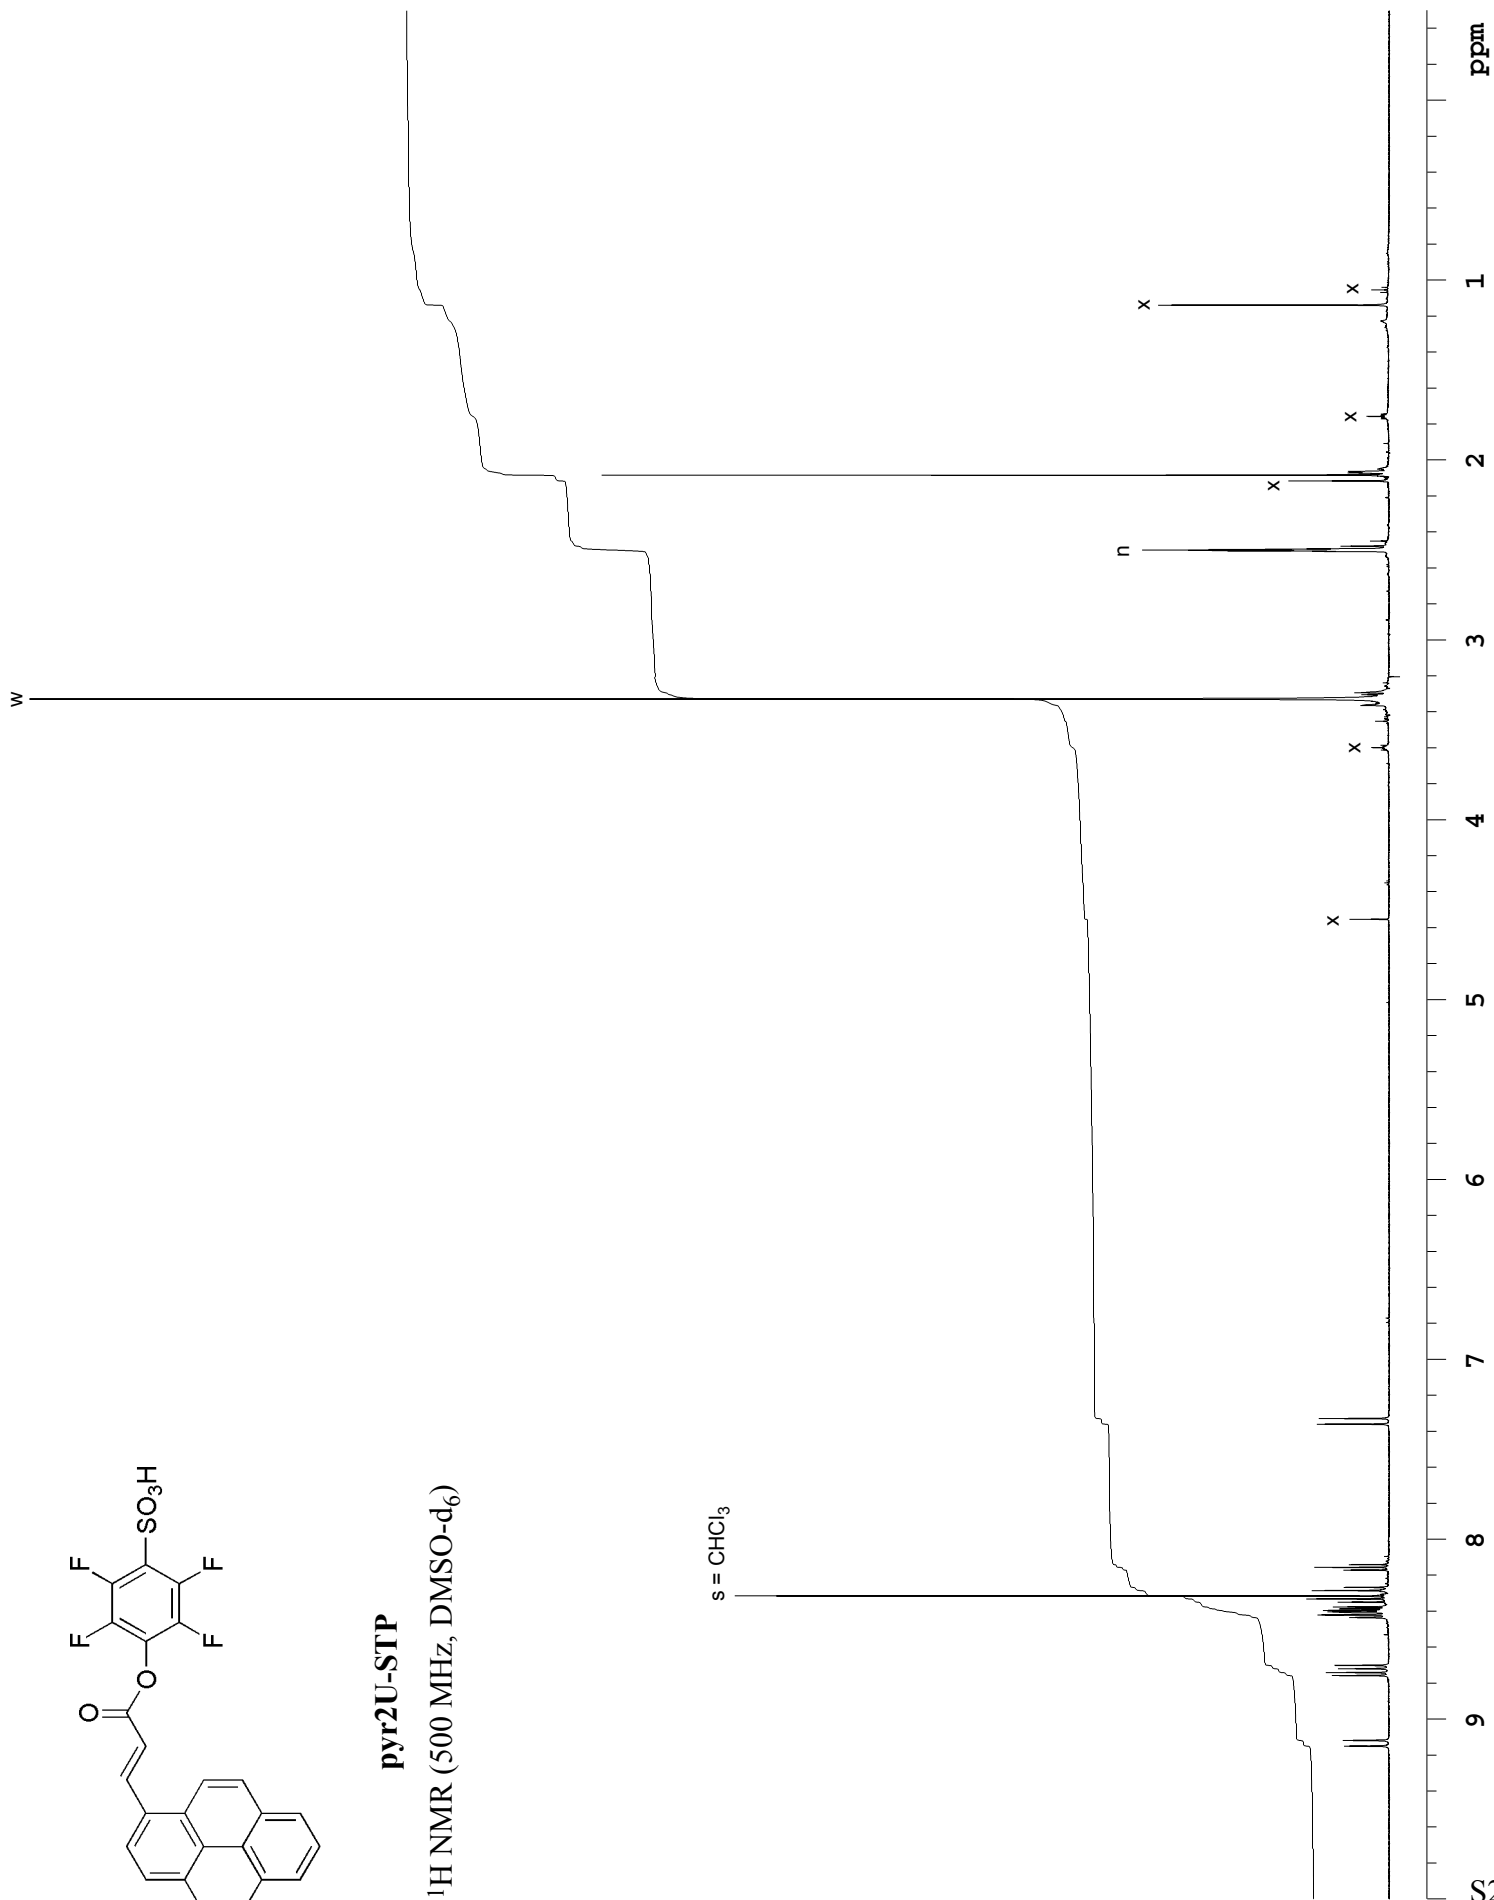

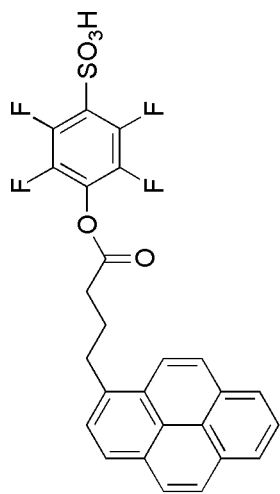

**pyr3-STP**

<sup>1</sup>H NMR (500 MHz, DMSO-d<sub>6</sub>)

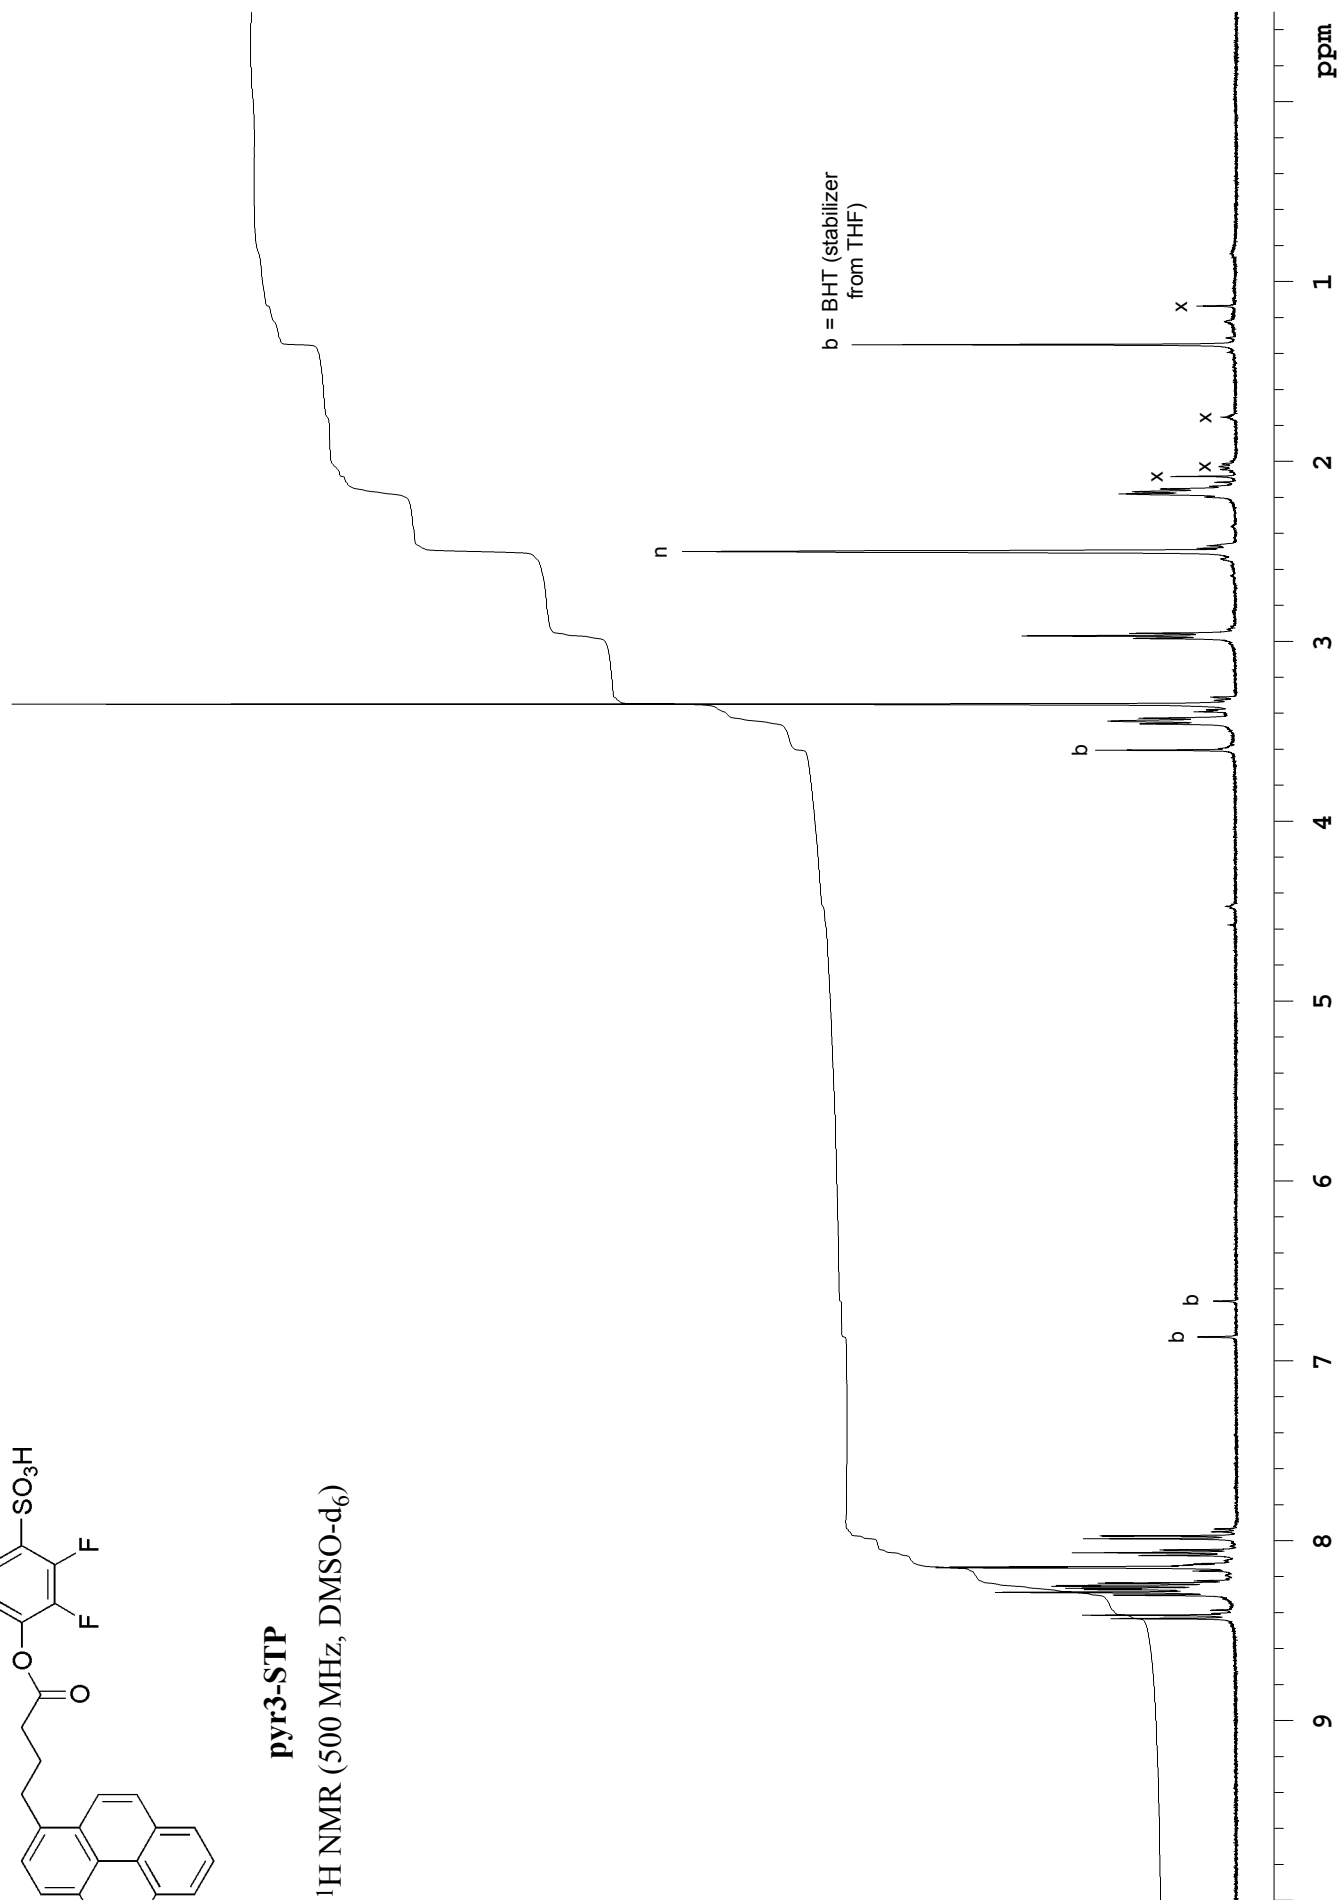

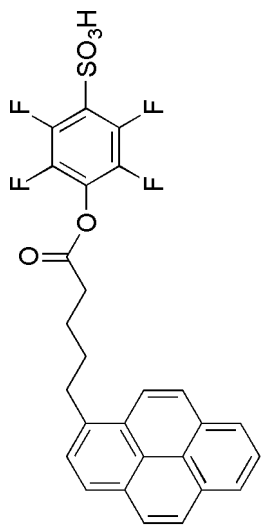

**pyr4-STP**

<sup>1</sup>H NMR (400 MHz, DMSO-d<sub>6</sub>)

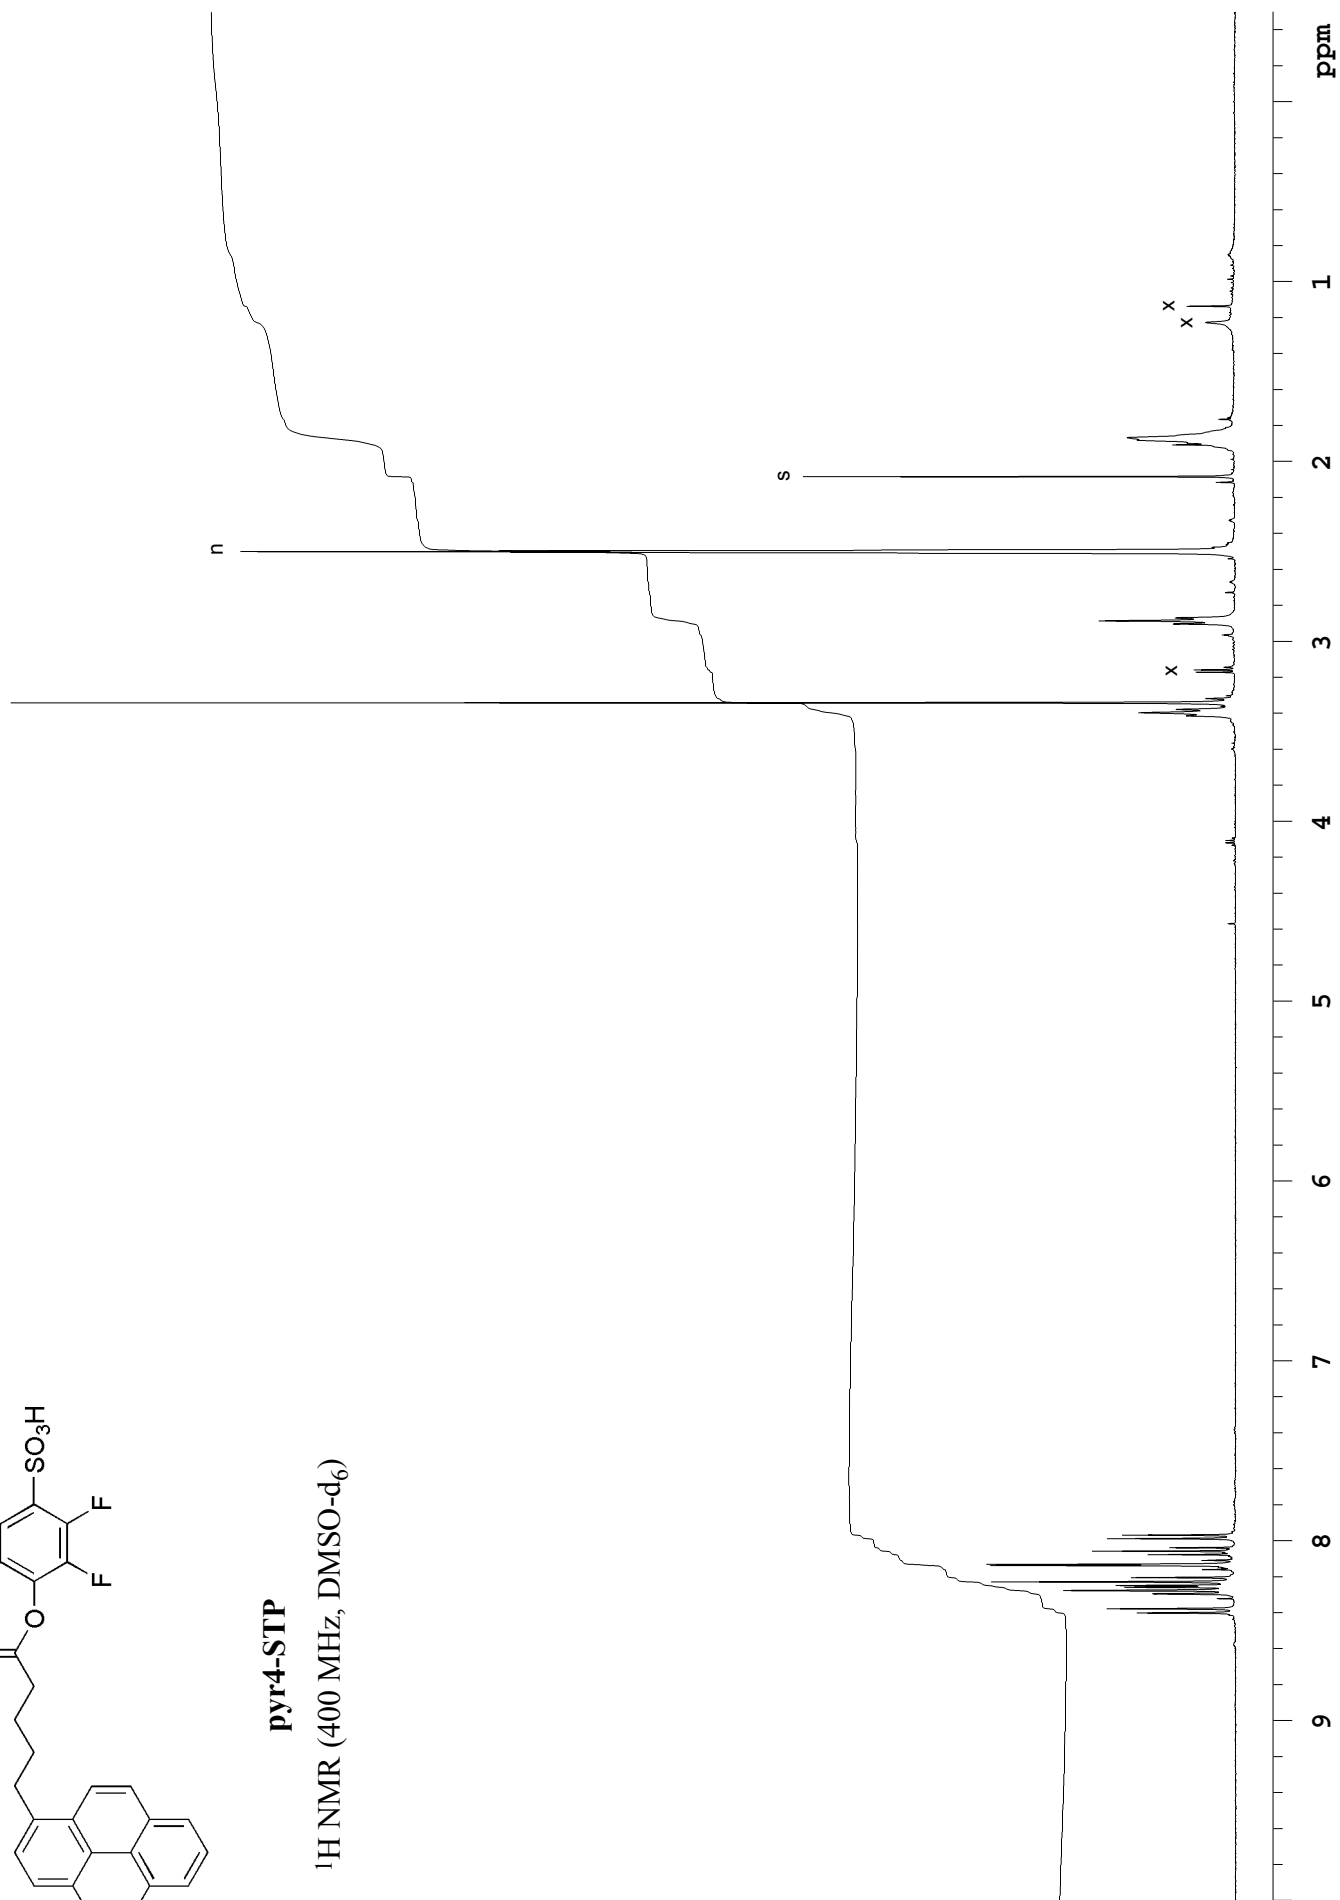

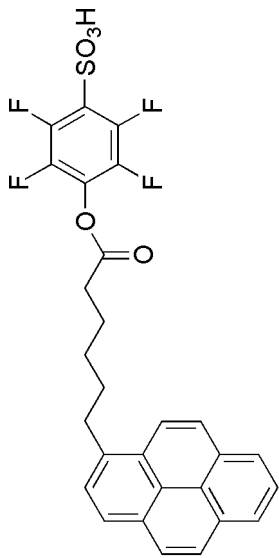

**pyr5-STP**

<sup>1</sup>H NMR (400 MHz, DMF-d<sub>7</sub>)

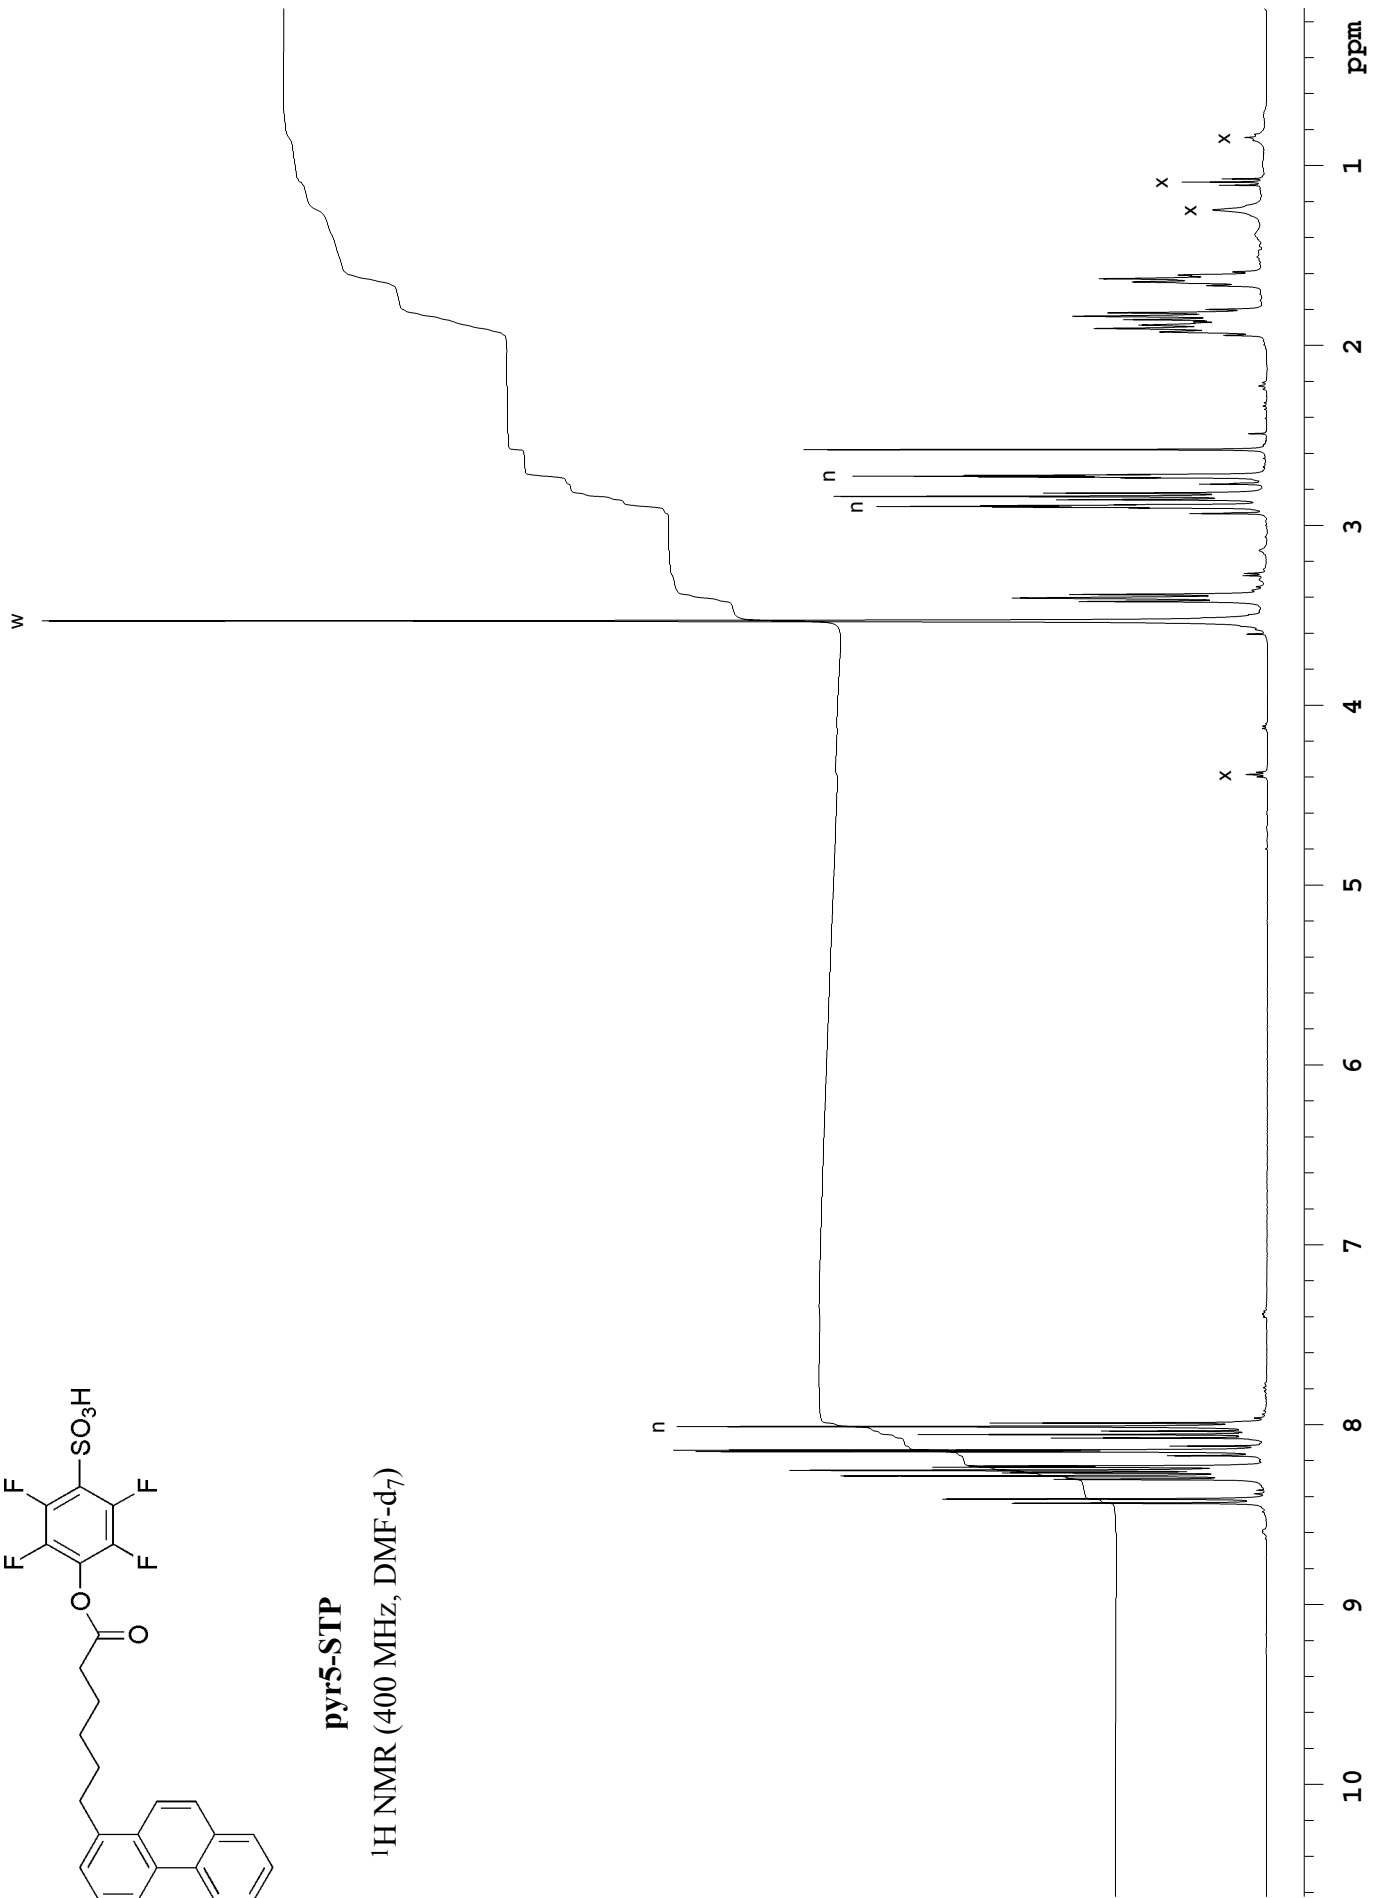

Supplement: nar_34_1_152__2.pdf [file nar_34_1_152__2.pdf]
