# Supplementary material
Source: PubMed Central journal article supplement (PMC1326244)

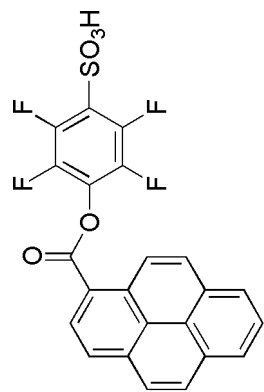

**pyr0-STP**

<sup>19</sup>F NMR (470 MHz, DMSO-d<sub>6</sub>)

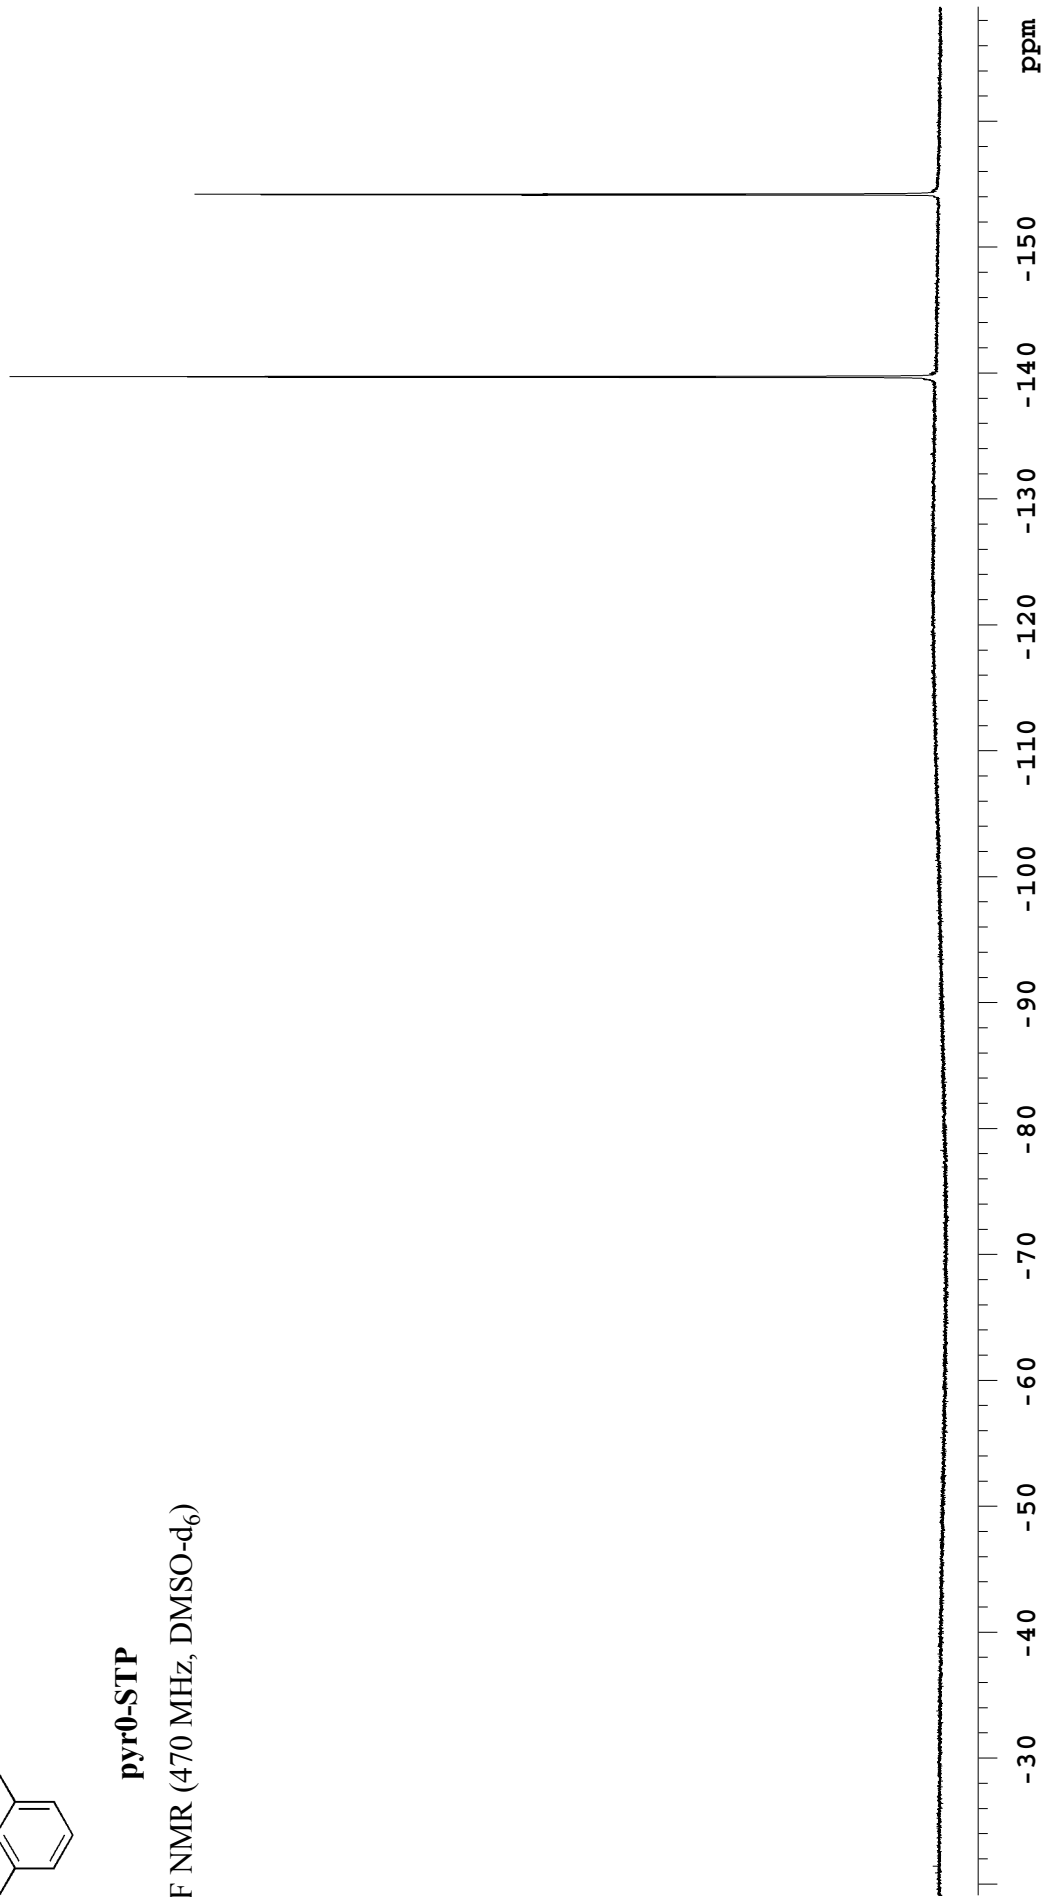

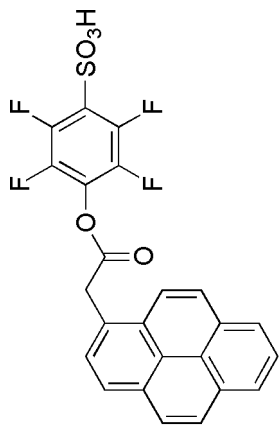

**pyr1-STP**

<sup>19</sup>F NMR (470 MHz, DMSO-d<sub>6</sub>)

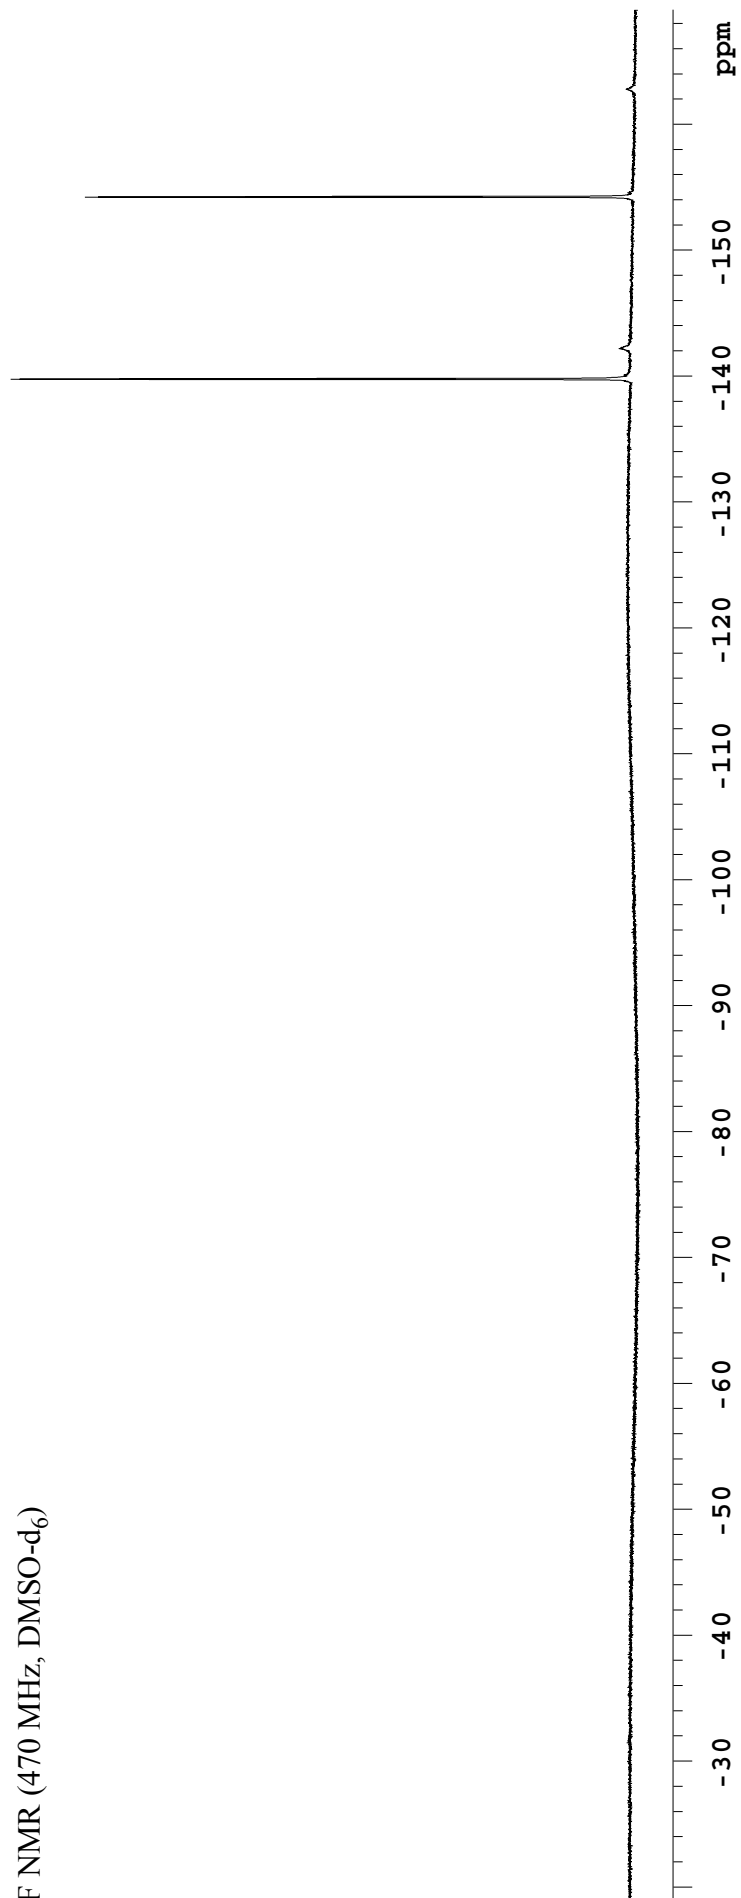

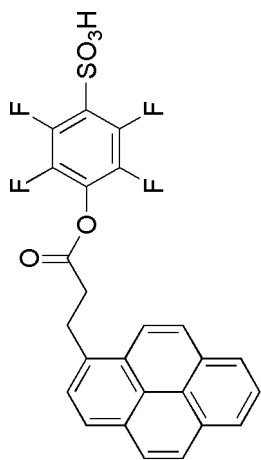

**pyr2-STP**

<sup>19</sup>F NMR (376 MHz, DMSO-d<sub>6</sub>)

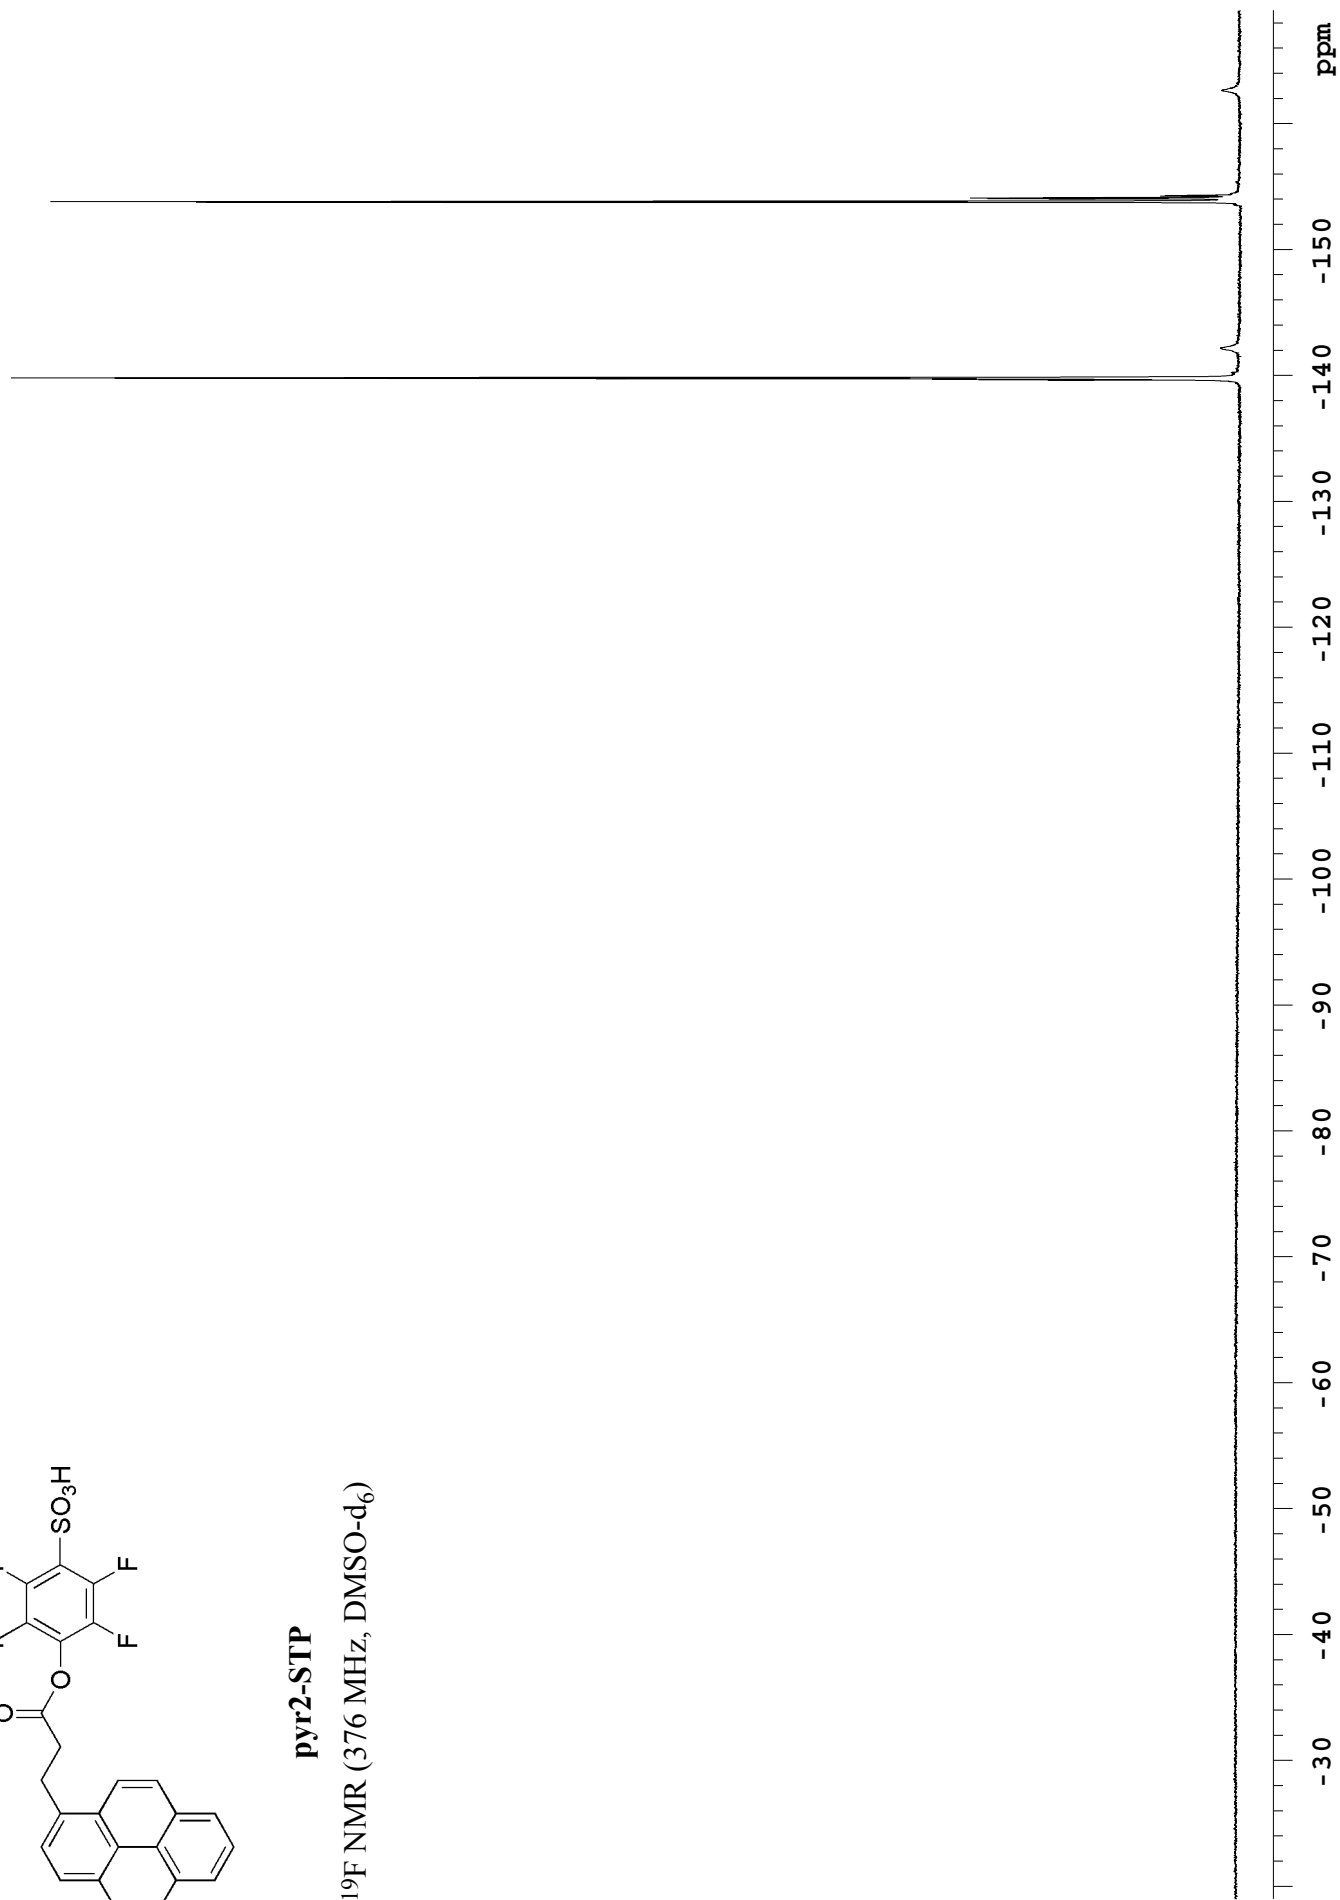

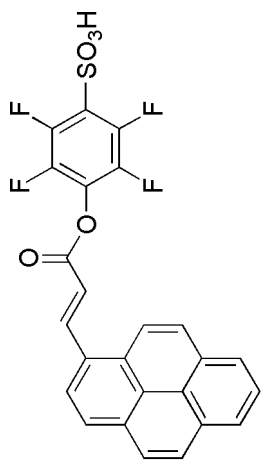

**pyr2U-STP**

<sup>19</sup>F NMR (470 MHz, DMSO-d<sub>6</sub>)

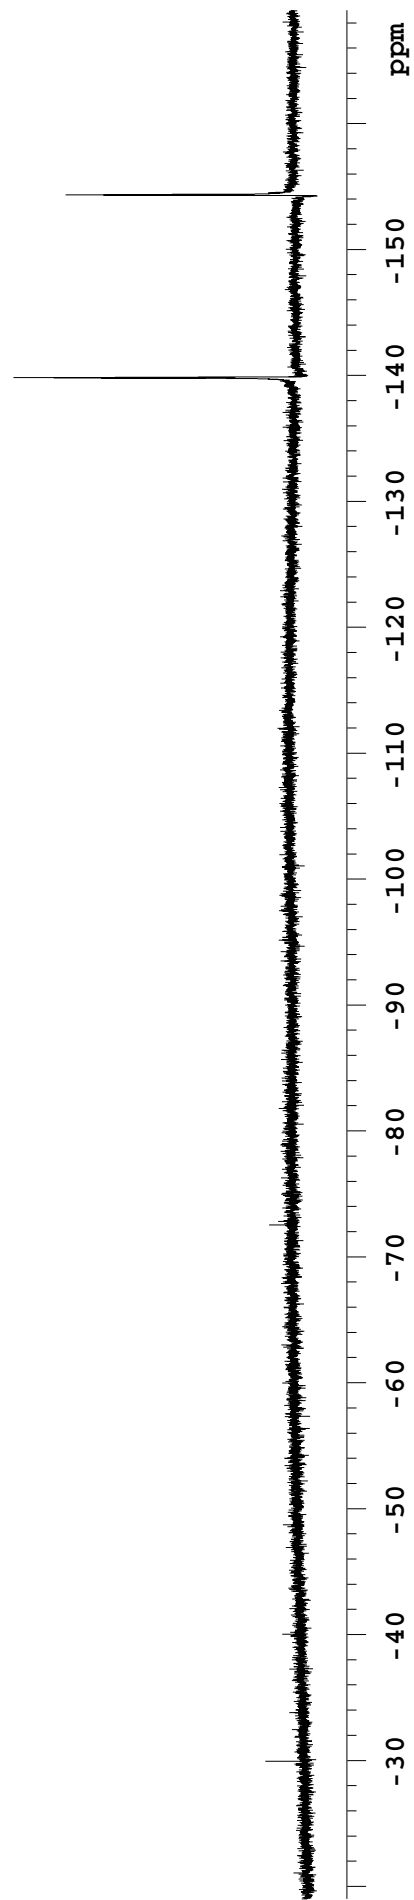

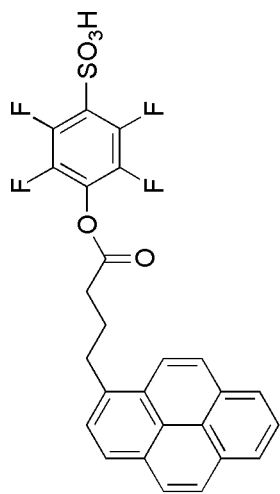

**pyr3-STP**

<sup>19</sup>F NMR (470 MHz, DMSO-d<sub>6</sub>)

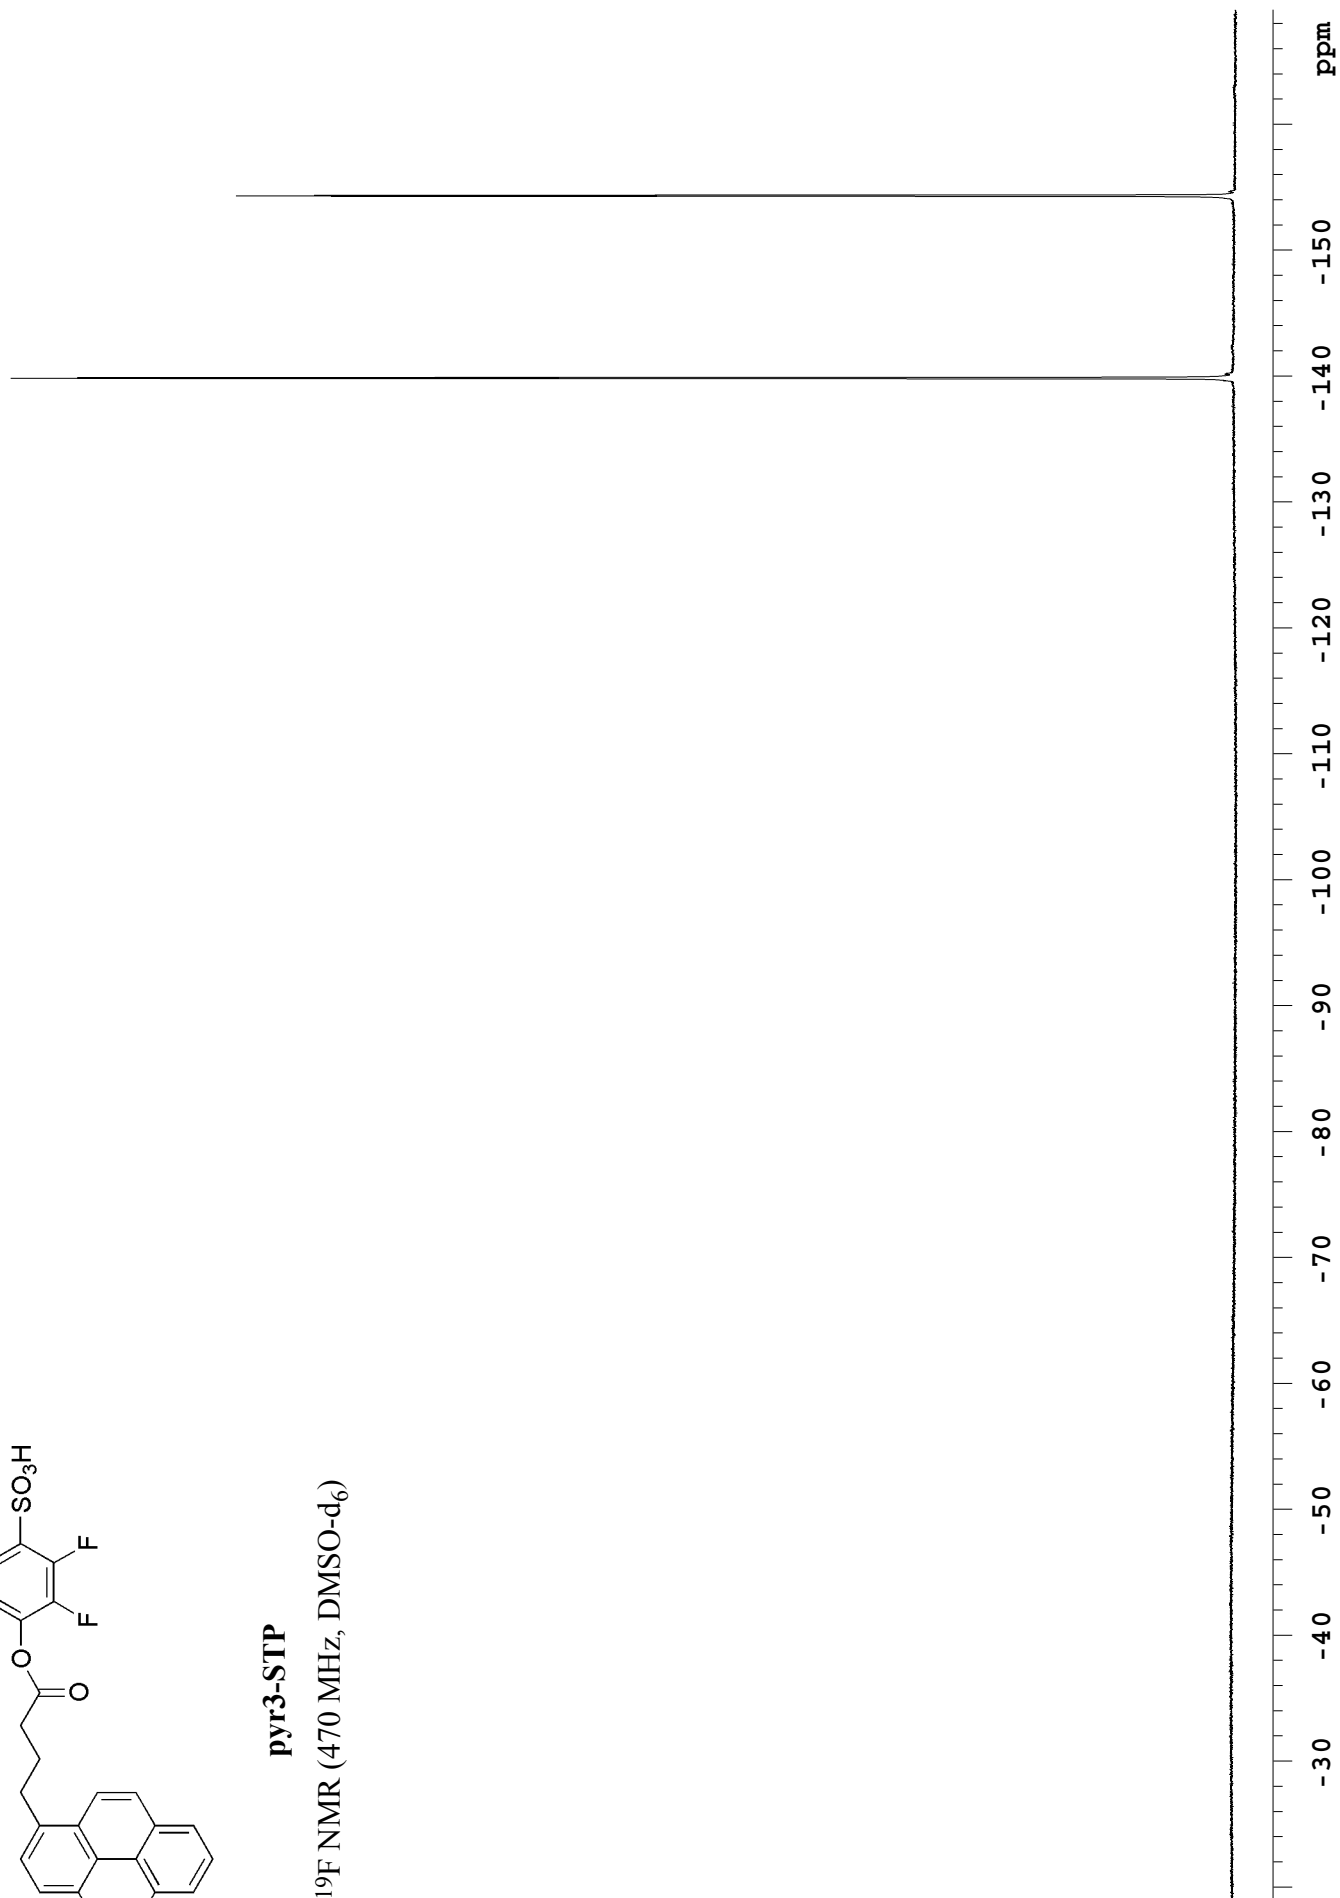

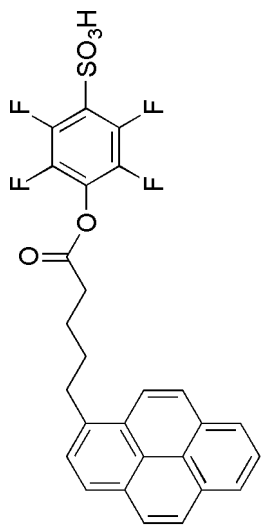

**pyr4-STP**

<sup>19</sup>F NMR (376 MHz, DMSO-d<sub>6</sub>)

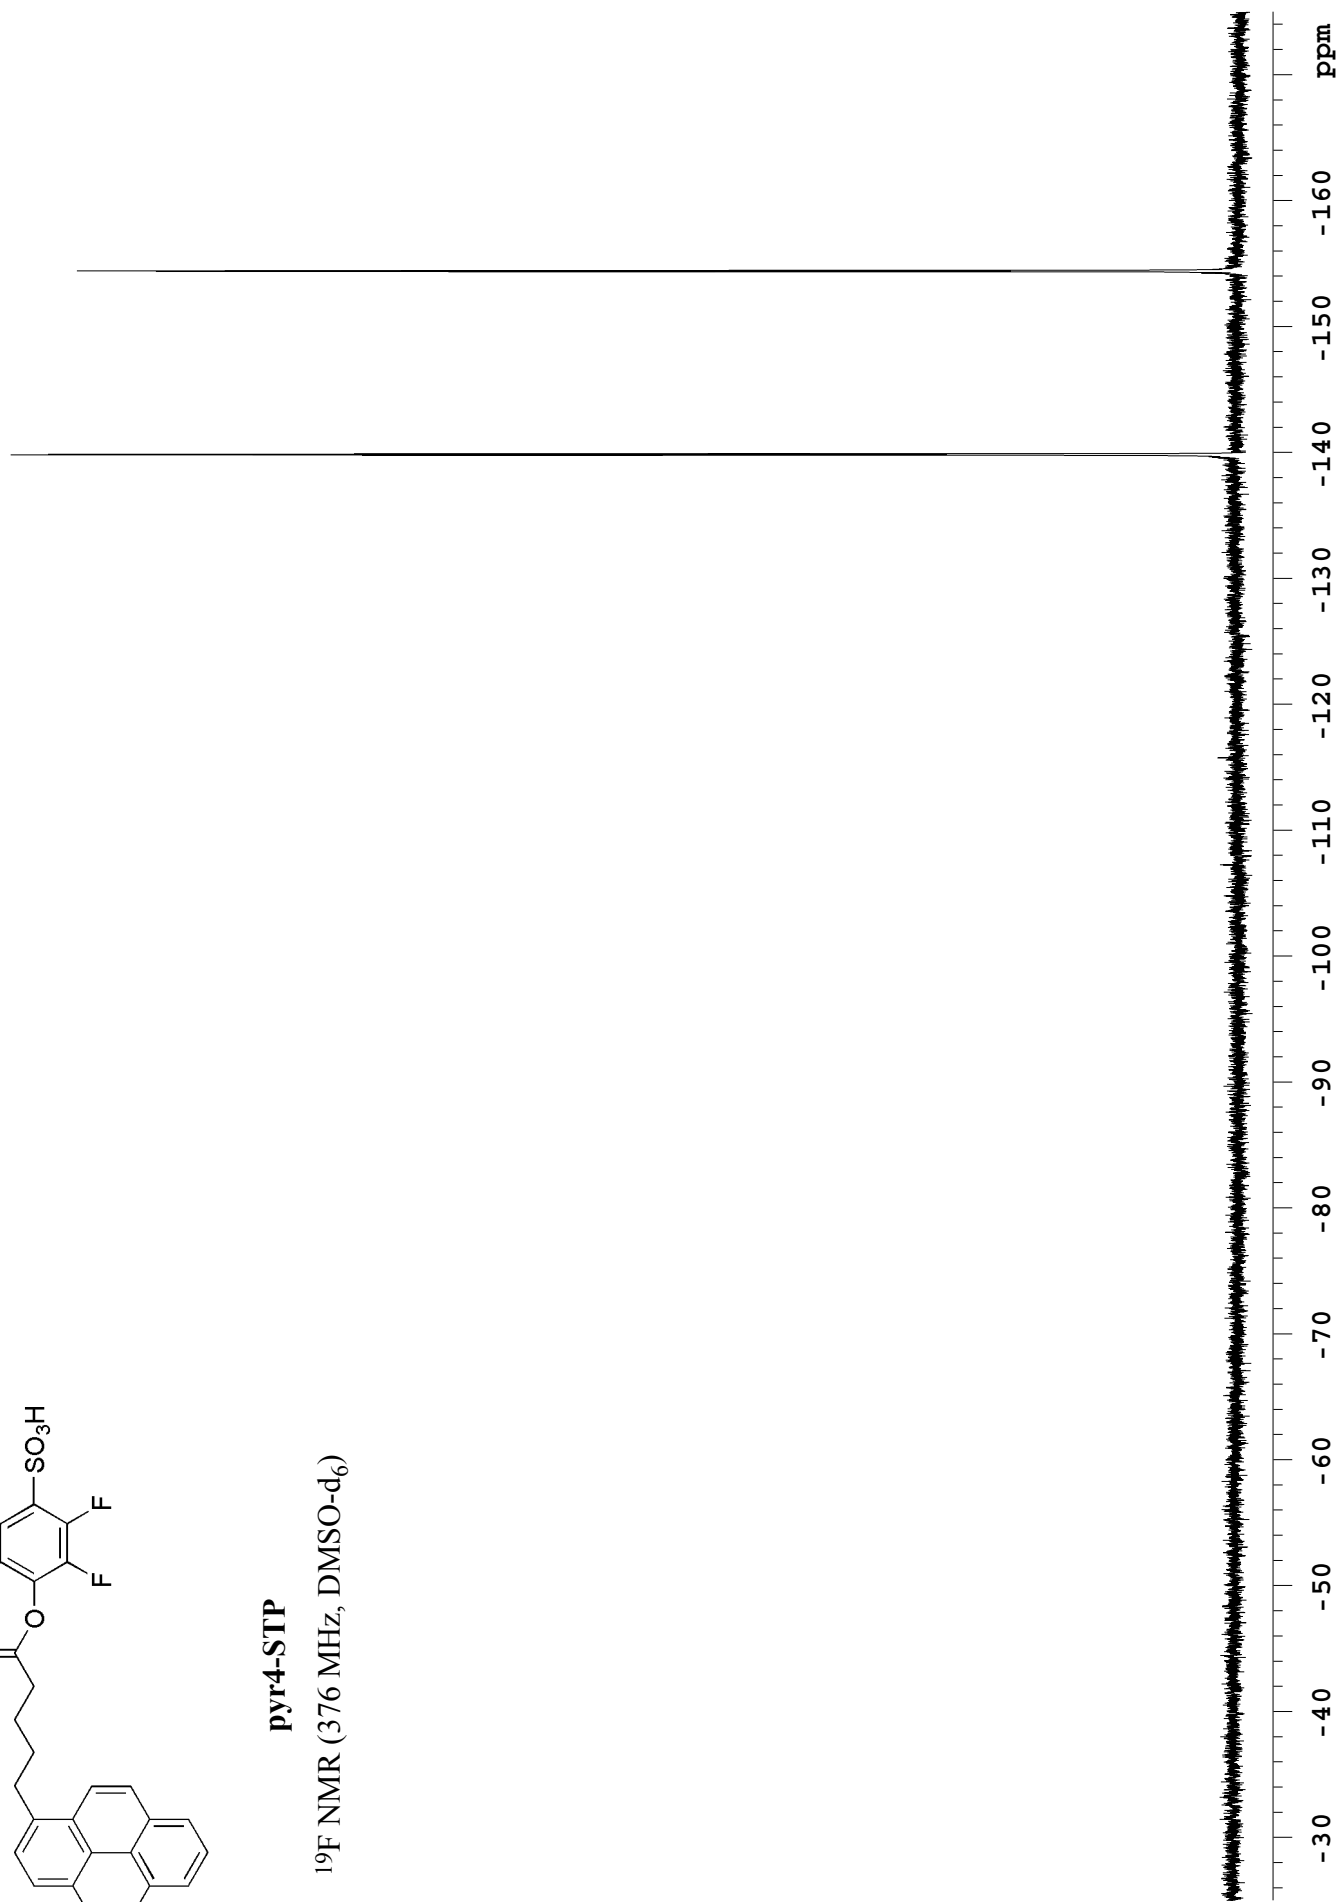

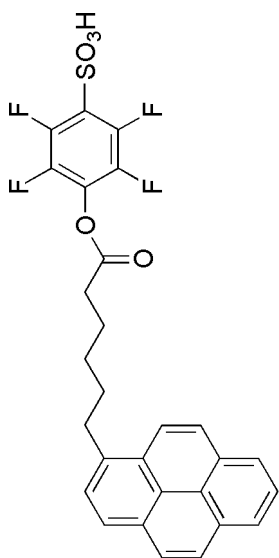

**pyr5-STP**

<sup>19</sup>F NMR (400 MHz, DMSO-d<sub>6</sub>)

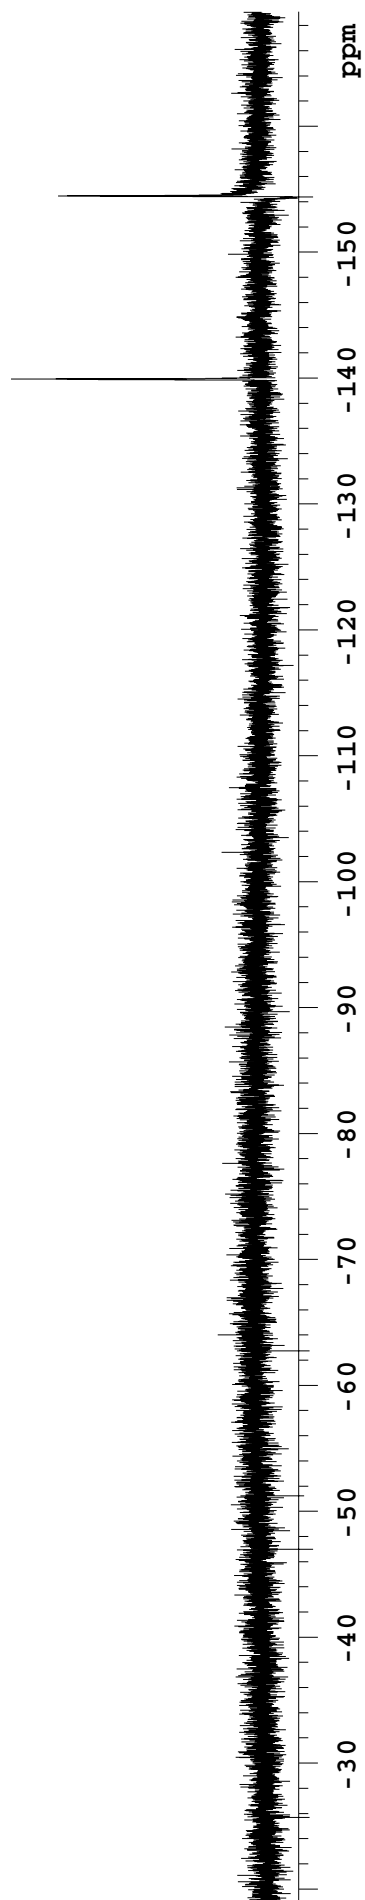

Supplement: nar_34_1_152__3.pdf [file nar_34_1_152__3.pdf]
